# Supplementary material for: Physiological status of plant tissue affects the frequency and types of mutations induced by carbon-ion irradiation in Arabidopsis
Source: PubMed Central journal article supplement (PMC5780457; doi:10.1038/s41598-018-19278-1), 2018-01-23
Supplement: 41598_2018_19278_MOESM1_ESM.pdf [file 41598_2018_19278_MOESM1_ESM.pdf]

**Physiological status of plant tissue affects the frequency and types of mutations  
induced by carbon-ion irradiation in Arabidopsis**

**-Supplementary Information-**

Yoshihiro Hase, Katsuya, Satoh, Satoshi Kitamura, Yutaka Oono

Takasaki Advanced Radiation Research Institute, National Institutes for Quantum and  
Radiological Science and Technology (QST), 1233 Watanuki, Takasaki, Gunma  
370-1292, Japan

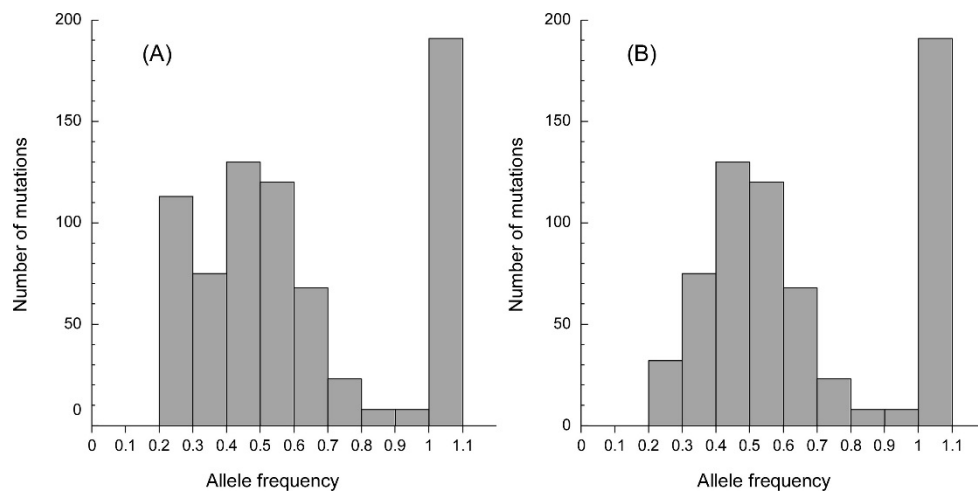

**Figure S1.** Distribution of allele frequencies for candidate mutations detected by GATK HaplotypeCaller algorithm. All candidate mutations with allele frequencies  $>0.20$  (A) and  $>0.25$  (B) are shown.

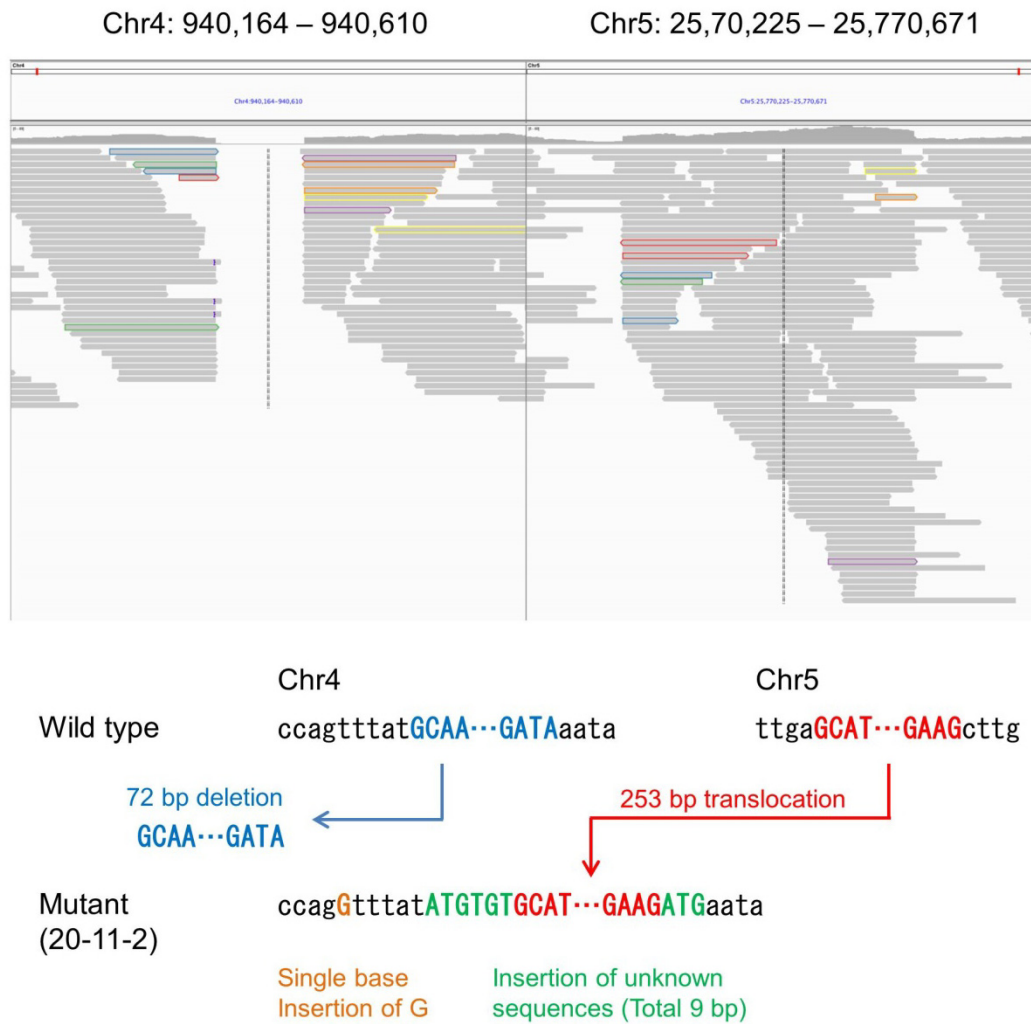

**Figure S2.** Structural variation identified in sample 20-11-2. (Upper) Captured screen image of IGV at two junction points of structural variation identified in sample 20-11-2. Several paired sequence reads are shown in the same colour, indicating inter-chromosomal connection between chromosomes 4 and 5. Increased depth in 253-bp region in chromosome 5 suggests duplication of this region in the genome, resulting from translocation from chromosome 5 to 4. (Lower) Sequence alteration confirmed by Sanger sequencing. Confirmed alteration was identical to that predicted from image of IGV and sequences of paired reads. The primer sequences used here were 5'-CTCATGGGCAGAAAAGTCGT-3' and 5'-GCTTGTTTTACTTCGGTTTCG-3'.

### Dry seed 125 Gy

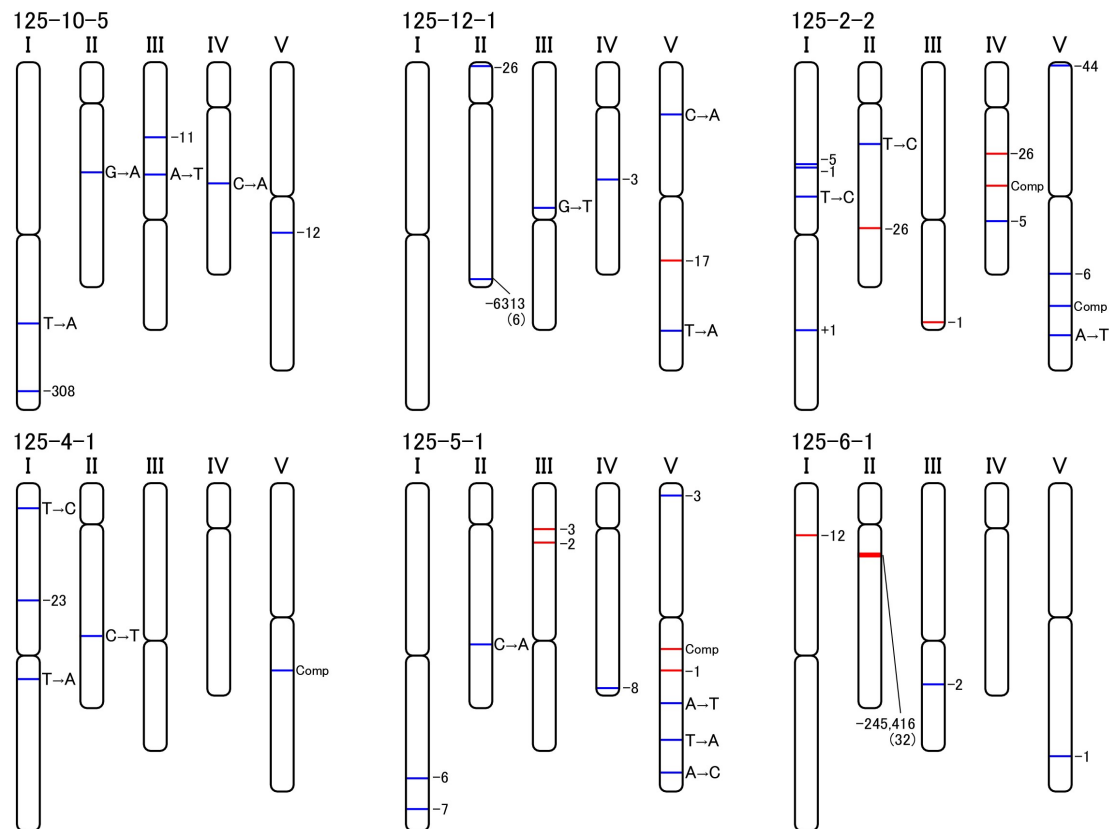

### Dry seed 175 Gy

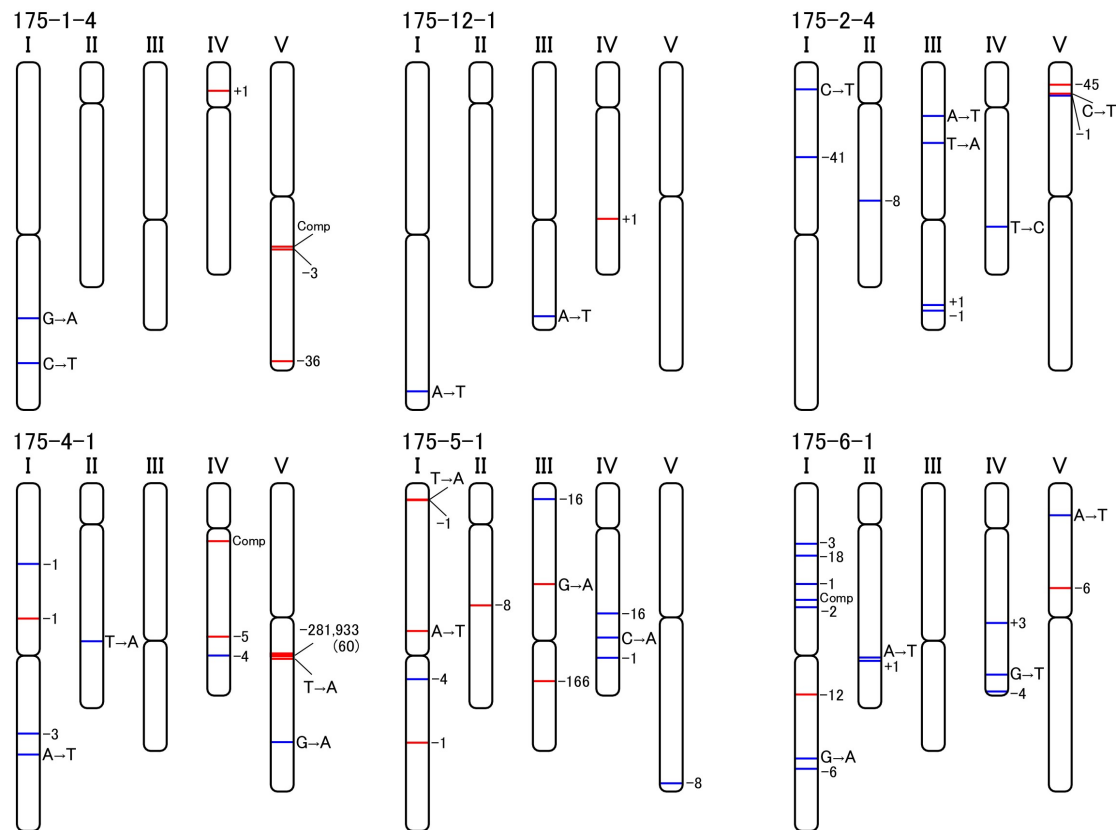

**Figure S3.** Distribution of mutation events that resulted in non-synonymous amino acid changes in protein-coding genes across chromosomes. Red and blue colour represent homozygous and heterozygous mutations, respectively. Transposable elements and pseudogenes are not included. Number of affected genes is shown in parenthesis if more than two genes are affected by a single mutation event.

### Seedling 20 Gy

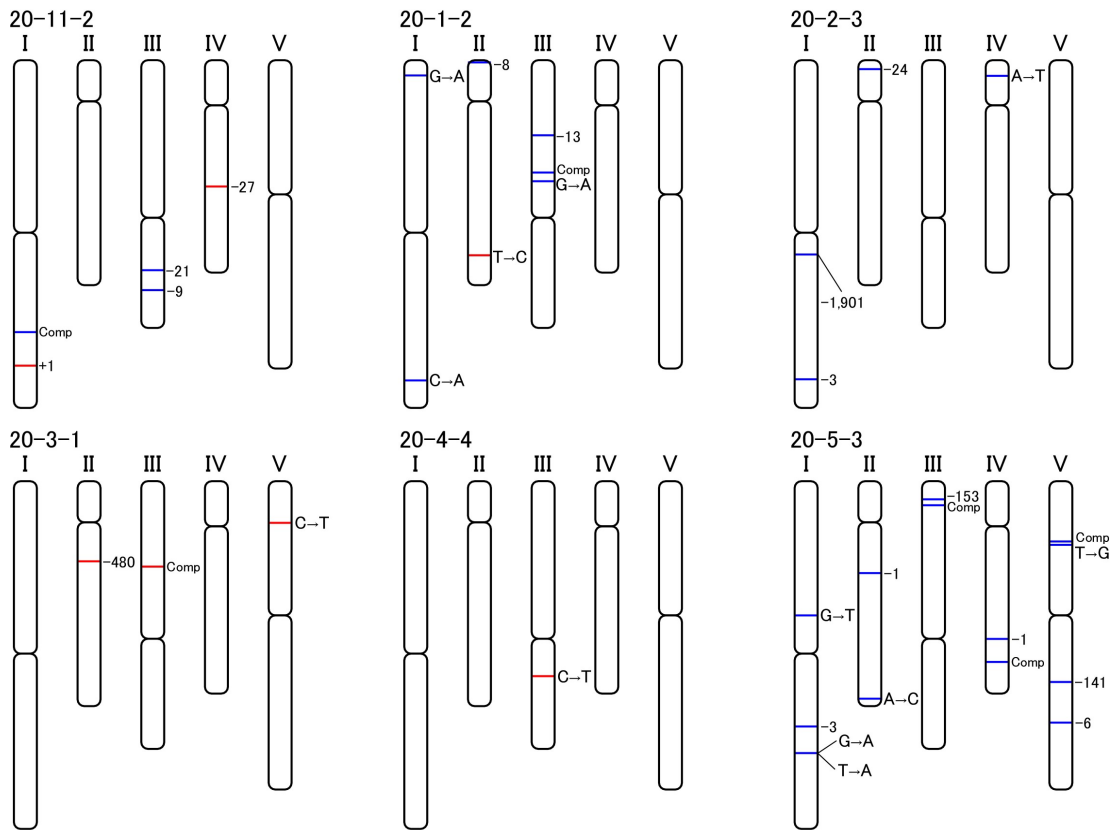

### Seedling 30 Gy

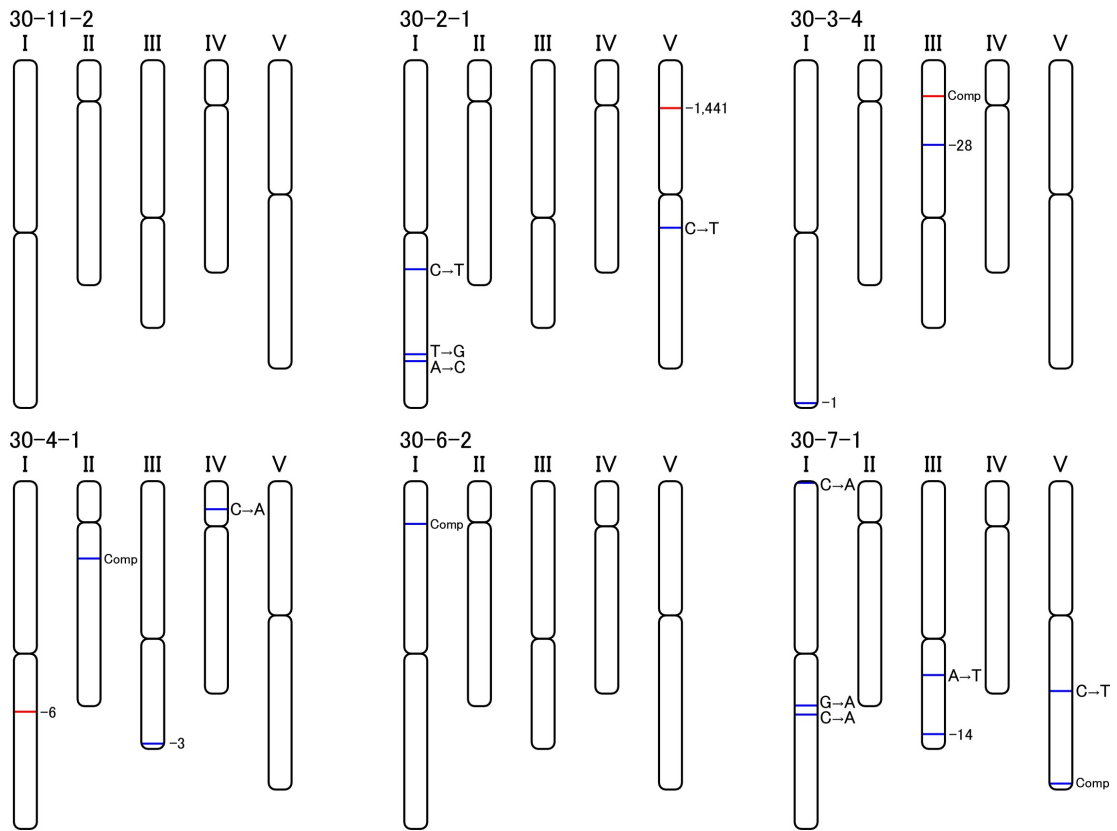

Figure S3. (Continued.)

**Table S1.** Summary of mapping results.

| Sample          | Total mapped<br>base (Mb) | Mean depth<br>of coverage | Coverage above<br>10x (%) |
|-----------------|---------------------------|---------------------------|---------------------------|
| Dry seed 125 Gy |                           |                           |                           |
| 125-10-5        | 4,533                     | 37.9                      | 99.4                      |
| 125-12-1        | 3,962                     | 33.2                      | 98.4                      |
| 125-2-2         | 3,258                     | 27.3                      | 93.1                      |
| 125-4-1         | 4,683                     | 39.2                      | 99.4                      |
| 125-5-1         | 4,143                     | 34.7                      | 99.0                      |
| 125-6-1         | 4,029                     | 33.7                      | 98.9                      |
| Dry seed 175 Gy |                           |                           |                           |
| 175-12-1        | 3,799                     | 31.8                      | 98.0                      |
| 175-1-4         | 4,179                     | 35.0                      | 98.6                      |
| 175-2-4         | 3,621                     | 30.3                      | 97.4                      |
| 175-4-1         | 3,891                     | 32.6                      | 98.5                      |
| 175-5-1         | 4,571                     | 38.3                      | 99.5                      |
| 175-6-1         | 4,326                     | 36.2                      | 98.8                      |
| Seedling 20 Gy  |                           |                           |                           |
| 20-11-2         | 4,595                     | 38.5                      | 99.5                      |
| 20-1-2          | 3,214                     | 26.9                      | 96.7                      |
| 20-2-3          | 3,776                     | 31.6                      | 98.6                      |
| 20-3-1          | 3,957                     | 33.1                      | 99.0                      |
| 20-4-4          | 4,015                     | 33.6                      | 98.1                      |
| 20-5-3          | 3,529                     | 29.5                      | 97.7                      |
| Seedling 30 Gy  |                           |                           |                           |
| 30-11-2         | 3,396                     | 28.4                      | 95.9                      |
| 30-2-1          | 4,460                     | 37.3                      | 99.4                      |
| 30-3-4          | 4,475                     | 37.5                      | 99.5                      |
| 30-4-1          | 3,654                     | 30.6                      | 98.1                      |
| 30-6-2          | 3,542                     | 29.7                      | 98.0                      |
| 30-7-1          | 3,570                     | 29.9                      | 97.3                      |
| Mean            | 3,966                     | 33.2                      | 98.2                      |
| SD              | 443                       | 3.7                       | 1.4                       |

**Table S2.** Results of verification of identified mutations.

| Sample          | Chr      | Position          | Type of Mutation | Detail   | Zygoty        | Result      | Forward and reverse primer (5'→3')                        | Allele Frequency*  |
|-----------------|----------|-------------------|------------------|----------|---------------|-------------|-----------------------------------------------------------|--------------------|
| 125-10-5        | 1        | 3,622,144         | SBS              | T→A      | Hetero        | True        | F: AACAGCATAGGGTTGGTTGG<br>R: TTTTGCATTCCAGACTGTCC        | 0.55 (12/22)       |
| 125-10-5        | 1        | 20,029,686        | SBS              | A→T      | Hetero        | True        | F: TGCGAGTAGAATGCACTTGG<br>R: AATTGCAGGCCACTGAAGAT        | 0.58 (21/36)       |
| 125-10-5        | 1        | 23,593,771        | SBS              | T→A      | Hetero        | True        | F: AGGAGCATTCTGCCAAAGAA<br>R: CCAGTCGAAGGAAGGATCTG        | 0.71 (25/35)       |
| 125-10-5        | 2        | 7,178,100         | SBS              | T→G      | Homo          | True        | F: CGACCCAACTCGTCATACC<br>R: GCATTTCTTATCTAATATTCCTGATG   | 1.00 (40/40)       |
| 125-10-5        | 2        | 9,957,746         | SBS              | G→A      | Hetero        | True        | F: ACCACACCCACGAAGTTCTC<br>R: ACCTTTGGCGATGATGAAAC        | 0.37 (13/35)       |
| 125-10-5        | 2        | 17,637,661        | SBS              | A→T      | Homo          | True        | F: GGC GTTTTCTCCATCTTCTG<br>R: AATGGGCTAAAAGGGACACC       | 1.00 (19/19)       |
| 125-10-5        | 3        | 6,715,992         | SBS              | C→A      | Hetero        | True        | F: GGAACGAGAGCTTATCTGGGTA<br>R: GCGACTTTCTCCCACAAAAC      | 0.32 (9/28)        |
| 125-10-5        | 3        | 10,132,131        | SBS              | A→T      | Hetero        | True        | F: AAGCAGCTGGACCAAGGTAA<br>R: ATTGAGCCGTGGTTGAAGAG        | 0.55 (16/29)       |
| 125-10-5        | 4        | 10,949,870        | SBS              | C→A      | Hetero        | True        | F: CAAGATTCGTGTCGGACAAA<br>R: TGAATGTTCCATGAATCAAGA       | 0.42 (8/19)        |
| 125-10-5        | 4        | 11,953,215        | SBS              | A→T      | Hetero        | True        | F: AAAAACGTTGCAAAAACAACA<br>R: CGTTGGTTCGATCAGTTTA        | 0.51 (18/35)       |
| <b>125-10-5</b> | <b>2</b> | <b>13,338,270</b> | <b>-1</b>        | <b>A</b> | <b>Hetero</b> | <b>True</b> | <b>F: CGACTACGAGGGACACTTGC<br/>R: TTTTCGAGGCTCATTCTCT</b> | <b>0.23 (5/22)</b> |
| 20-11-2         | 5        | 556,406           | -1               | G        | Hetero        | True        | F: AACGTAAGATGGCGTGGTTC<br>R: ACAACCCTAGCCGCCTTAT         | 0.59 (23/39)       |
| 20-11-2         | 5        | 10,291,632        | -1               | A        | Hetero        | True        | F: AATGGGGATTTCATTGGGTTT<br>R: CGATTTTGCCCTCATTCTTC       | 0.39 (9/23)        |
| 175-1-4         | 1        | 8,176,912         | -1               | G        | Hetero        | True        | F: TTTGGGAATTTTTGTGTGGA<br>R: ATATGCCAACGCCATTCTTC        | 0.40 (8/20)        |
| 175-1-4         | 2        | 10,388,368        | -1               | A        | Homo          | True        | F: GGATGAGTTTGCCTGTGTGT<br>R: GACGTCGAAAAAGTTTGGGA        | 1.00 (28/28)       |
| 175-1-4         | 5        | 84,346            | -1               | A        | Hetero        | True        | F: GGCAAGAATGTGCGTTTGAT<br>R: GTCGGATCAATGGTTGGATT        | 0.44 (12/27)       |
| 175-1-4         | 5        | 7,195,682         | -1               | T        | Homo          | True        | F: AACCTTTCCCAATCAAAGG<br>R: AATTCCTTTCTCCCGTCCAC         | 1.00 (23/23)       |

|                |          |                   |                 |                         |               |              |                                                                 |                    |
|----------------|----------|-------------------|-----------------|-------------------------|---------------|--------------|-----------------------------------------------------------------|--------------------|
| <b>175-1-4</b> | <b>5</b> | <b>20,942,238</b> | <b>-1</b>       | <b>A</b>                | <b>Hetero</b> | <b>False</b> | <b>F: TGCCTGAATTTTCAAATGCTC<br/>R: CGTGTGTATACCAATAATCGTTTC</b> | <b>0.25 (4/16)</b> |
| 125-10-5       | 1        | 25,115,764        | Del_≥2 bp       | -2 bp                   | Hetero        | True         | F: ATCAGCCCACCAAGAAATTG<br>R: GCTGCCACTGCATACTCAGA              | 0.38 (8/21)        |
| 125-10-5       | 1        | 29,787,264        | Del_≥2 bp       | -308 bp                 | Hetero        | True         | F: GGGTTCCAACCAACAAGATG<br>R: CAGGCTACTAAAAATAATGCCAAT          |                    |
| 125-10-5       | 2        | 6,248,477         | Del_≥2 bp       | -22 bp                  | Hetero        | True **      | F: TTCCCAAAGGTGTGACTTT<br>R: GCGCCTATCATGATGTGATT               | 0.40 (14/35)       |
| 125-10-5       | 3        | 6,821,869         | Del_≥2 bp       | -11 bp                  | Hetero        | True **      | F: GAAGGATGCGAAGCAAAGTC<br>R: AGGGCTGGATGAGCCTCTA               | 0.39 (12/31)       |
| 125-10-5       | 3        | 16,755,265        | Del_≥2 bp       | -2 bp                   | Hetero        | True         | F: TGTTGGTTCGGTAAAAGACGA<br>R: AGAGGGCCTTGCAGAAGTTT             | 0.47 (7/15)        |
| 125-10-5       | 4        | 11,649,411        | Del_≥2 bp       | -144 bp                 | Hetero        | True **      | F: GGTCGATTTGCAATTACCTGA<br>R: CACATGGATCAAGATTCATTCAATA        |                    |
| 125-10-5       | 5        | 15,422,503        | Del_≥2 bp       | -12 bp                  | Hetero        | True **      | F: ATCGCTGCCTCAGGTCTAAA<br>R: TTGTTTCATACCACCAGCACAA            | 0.29 (6/21)        |
| 20-11-2        | 1        | 26,986,773        | +1              | T                       | Homo          | True         | F: GAAGCGTTGTTTGGGATCTG<br>R: GAACCATGCGTCTTCACTCA              | 1.00 (25/25)       |
| 30-11-2        | 1        | 18,032,053        | +1              | A                       | Homo          | True         | F: CGAACCCCTTCAATCATTGGT<br>R: TGAGAGGCTTTCCTCCTTGA             | 1.00 (18/18)       |
| 175-1-4        | 4        | 2,556,689         | +1              | TCG→AACT                | Homo          | True         | F: AGAGTCAAAGCCGAAAAGCA<br>R: GACGGAATCCTCTCCATCAA              | 1.00 (32/32)       |
| <b>20-11-2</b> | <b>5</b> | <b>638,204</b>    | <b>Ins_≥2bp</b> | <b>+2 bp</b>            | <b>Hetero</b> | <b>False</b> | <b>F: CAAACCAGACCAGACAACGA<br/>R: CGCTGCAACTGATGATAACG</b>      | <b>0.22 (4/18)</b> |
| 125-12-1       | 1        | 20,607,208        | Ins_≥2bp        | +27 bp                  | Homo          | True         | F: AGATTCTCCGGCGATACCTC<br>R: GTCCGATTCTGATTCTCCA               | 1.00 (14/14)       |
| 30-11-2        | 1        | 8,024,381         | Ins_≥2bp        | +47 bp                  | Homo          | True         | F: ATCCAACGTGTTTCGTAGCC<br>R: TTCGAAGACAAAATCCATCAAAA           | 1.00 (10/10)       |
| 175-1-4        | 2        | 17,134,939        | Ins_≥2bp        | +5 bp                   | Hetero        | True         | F: TCAGAGGATGGAGTGGGTTC<br>R: CTGGGAAGTGCTTCAACGTC              | 0.57 (12/21)       |
| 175-1-4        | 3        | 1,064,359         | Ins_≥2bp        | +2 bp                   | Hetero        | True         | F: TTGTTTTGAATGCGATGCTC<br>R: TTTGAGGGAAGAAGAAAATCACTT          | 0.70 (16/23)       |
| 125-10-5       | 2        | 5,641,286         | Complex         | CC→AT                   | Hetero        | True         | F: GCCCCTAAGCGTGATTTTGT<br>R: GCCTGAGGAAGGATATCTGATG            | 0.48 (11/23)       |
| 20-11-2        | 1        | 20,029,121        | Complex         | GCA→AGT                 | Hetero        | True         | F: TCCATTGACCCAAAACTCC<br>R: TGGAAAGACAACAACCATGAA              | 0.43 (12/28)       |
| 20-11-2        | 1        | 24,023,841        | Complex         | See Table S6 for detail | Hetero        | True **      | F: GGGTCAGCTTCTGAGGTCAT<br>R: TCTGCAATTCCGTATCATGC              |                    |



|         |   |           |         |                         |        |         |                                                        |              |
|---------|---|-----------|---------|-------------------------|--------|---------|--------------------------------------------------------|--------------|
| 20-11-2 | 3 | 2,999,203 | Complex | See Table S6 for detail | Hetero | True ** | F: AGCTCCGTTGACCAAAAAGA<br>R: TTTCACGTAATATCAAACATCCAA | 0.34 (10/29) |
|---------|---|-----------|---------|-------------------------|--------|---------|--------------------------------------------------------|--------------|

---

Candidate mutations with allele frequencies of  $\leq 0.25$ , which were excluded from this study, are shown in bold.

\* Allele frequencies are not shown for those detected by Pindel and BreakDancer algorithms. Numbers in parentheses represent number of mutant alleles/number of total alleles at the site.

\*\* Only junction sequences (~5 bp) were confirmed.

**Table S3.** Predicted structural variations caused by irradiation treatments.

## Structural variations identified in dry-seed irradiation.

| Sample  | Deduced structural variation                                     |
|---------|------------------------------------------------------------------|
| 125-4-1 | Intra-chromosomal inversion (chr4, ca. 312 kbp)                  |
| 125-6-1 | Intra-chromosomal inversion (chr2, ca. 521 kbp)                  |
| 125-6-1 | Intra-chromosomal inversion (chr4, ca. 207 kbp)                  |
| 175-2-4 | Intra-chromosomal inversion (chr1, ca. 11 kbp)                   |
| 175-2-4 | Intra-chromosomal inversion (chr3, ca. 382 kbp)                  |
| 175-5-1 | Intra-chromosomal translocation (chr3, ca. 4168 kbp and 179 kbp) |
| 175-4-1 | Inter-chromosomal translocation (chr2 and 5) *                   |
| 175-4-1 | Inter-chromosomal translocation (chr3 and 5) *                   |

\* Failed to predict overall structure.

## Structural variations identified in seedling irradiation.

| Sample  | Deduced structural variation                                                          |
|---------|---------------------------------------------------------------------------------------|
| 20-11-2 | Inter-chromosomal translocation (chr5 to 4, ca. 253 bp)**                             |
| 20-1-2  | Reciprocal translocation (chr1 and 2)                                                 |
| 20-1-2  | Inter-chromosomal translocation (chr3 to 4) *                                         |
| 20-1-2  | Intra-chromosomal inversion (chr5, ca. 14 kbp)                                        |
| 20-2-3  | Intra-chromosomal inversion (chr2) *                                                  |
| 20-2-3  | Intra-chromosomal inversion (chr5) *                                                  |
| 20-4-4  | Intra-chromosomal inversion (chr2, ca. 431 kbp with 26-kbp deletion)                  |
| 30-11-2 | Intra-chromosomal translocation (chr1, ca. 1 kbp) and inversion (chr1, ca. 38 kbp)    |
| 30-11-2 | Intra-chromosomal translocation (chr5, ca. 705 kbp) and inversion (chr5, ca. 573 kbp) |
| 30-2-1  | Inter-chromosomal translocation (chr3 to 1, ca. 500 bp)                               |
| 30-4-1  | Intra-chromosomal translocation (chr4, ca. 255 kbp)                                   |

\* Failed to predict overall structure.

\*\* Details are shown in Supplemental Figure S2.

**Table S4.** Zygosity of identified mutations.

| Dry-seed 125 Gy     |          |          |         |         |         |         |                  |
|---------------------|----------|----------|---------|---------|---------|---------|------------------|
| Sample              | 125-10-5 | 125-12-1 | 125-2-2 | 125-4-1 | 125-5-1 | 125-6-1 | Total            |
| Homo                | 2        | 17       | 9       | 6       | 14      | 15      | 63 (10.5 ± 2.4)  |
| Hetero              | 18       | 19       | 30      | 24      | 20      | 16      | 127              |
| Total               | 20       | 36       | 39      | 30      | 34      | 31      | 190 (31.7 ± 2.7) |
| Hetero / homo ratio | 9.0      | 1.1      | 3.3     | 4.0     | 1.4     | 1.1     | (3.3 ± 1.2)      |
| Dry-seed 175 Gy     |          |          |         |         |         |         |                  |
| Sample              | 175-1-4  | 175-12-1 | 175-2-4 | 175-4-1 | 175-5-1 | 175-6-1 | Total            |
| Homo                | 19       | 6        | 8       | 15      | 27      | 8       | 83 (13.8 ± 3.3)  |
| Hetero              | 12       | 21       | 39      | 23      | 23      | 27      | 145              |
| Total               | 31       | 27       | 47      | 38      | 50      | 35      | 228 (38.0 ± 3.7) |
| Hetero / homo ratio | 0.6      | 3.5      | 4.9     | 1.5     | 0.9     | 3.4     | (2.5 ± 0.7)      |
| Seedling 20 Gy      |          |          |         |         |         |         |                  |
| Sample              | 20-11-2  | 20-1-2   | 20-2-3  | 20-3-1  | 20-4-4  | 20-5-3  | Total            |
| Homo                | 7        | 8        | 4       | 9       | 4       | 3       | 35 (5.8 ± 1.0)   |
| Hetero              | 15       | 19       | 17      | 9       | 7       | 30      | 97               |
| Total               | 22       | 27       | 21      | 18      | 11      | 33      | 132 (22.0 ± 3.1) |
| Hetero / homo ratio | 2.1      | 2.4      | 4.3     | 1.0     | 1.8     | 10.0    | (3.6 ± 1.4)      |
| Seedling 30 Gy      |          |          |         |         |         |         |                  |
| Sample              | 30-11-2  | 30-2-1   | 30-3-4  | 30-4-1  | 30-6-2  | 30-7-1  | Total            |
| Homo                | 5        | 7        | 4       | 3       | 1       | 0       | 20 (3.3 ± 1.1)   |
| Hetero              | 15       | 16       | 8       | 14      | 11      | 33      | 97               |
| Total               | 20       | 23       | 12      | 17      | 12      | 33      | 117 (19.5 ± 3.2) |
| Hetero / homo ratio | 3.0      | 2.3      | 2.0     | 4.7     | 11.0    | - *     | (4.6 ± 1.5**)    |

Structural variations are not included. Numbers in parentheses represent mean ± standard error of 6 samples in each group.

\* Ratio could not be calculated, because all identified mutations were heterozygous.

\*\* Data from sample 30-7-1 were not included in calculation.

**Table S5.** Details of insertion and deletion mutations.

Single-base deletions identified in dry-seed irradiation.

| Sample   | Chr | Position   | Type of mutation | Sequence           |
|----------|-----|------------|------------------|--------------------|
| 125-12-1 | 1   | 297,283    | -1               | ccca <b>T</b> aaga |
| 125-12-1 | 1   | 922,788    | -1               | tgat <b>A</b> aaat |
| 125-12-1 | 1   | 4,915,941  | -1               | tctc <b>A</b> agtc |
| 125-12-1 | 1   | 7,320,957  | -1               | tttc <b>A</b> agtt |
| 125-12-1 | 2   | 11,837,433 | -1               | gccc <b>A</b> aaaa |
| 125-12-1 | 3   | 16,902,286 | -1               | caga <b>T</b> tttt |
| 125-12-1 | 3   | 19,919,338 | -1               | ctat <b>A</b> atcg |
| 125-2-2  | 3   | 18,875,489 | -1               | gaag <b>A</b> aaaa |
| 125-2-2  | 3   | 23,408,189 | -1               | aaca <b>T</b> tatc |
| 125-2-2  | 4   | 12,094,794 | -1               | aata <b>T</b> tttt |
| 125-2-2  | 4   | 13,326,642 | -1               | ataa <b>T</b> tatg |
| 125-2-2  | 5   | 19,338,359 | -1               | acca <b>C</b> aaaa |
| 125-4-1  | 3   | 9,542,017  | -1               | tttc <b>T</b> gtt  |
| 125-4-1  | 5   | 23,187,571 | -1               | aata <b>T</b> ttta |
| 125-5-1  | 1   | 22,356,811 | -1               | gggg <b>A</b> aaaa |
| 125-5-1  | 1   | 28,796,972 | -1               | acta <b>G</b> ggag |
| 125-5-1  | 5   | 16,600,638 | -1               | tgat <b>G</b> cctc |
| 125-6-1  | 2   | 5,459,889  | -1               | aaat <b>A</b> aaaa |
| 125-6-1  | 3   | 17,202,547 | -1               | atat <b>C</b> tttt |
| 125-6-1  | 5   | 22,930,227 | -1               | ccca <b>T</b> tttt |
| 125-6-1  | 5   | 23,294,994 | -1               | tgag <b>T</b> tttt |
| 125-6-1  | 5   | 24,196,261 | -1               | tacc <b>G</b> agcg |
| 175-12-1 | 2   | 16,477,858 | -1               | tttc <b>T</b> tcct |
| 175-12-1 | 3   | 17,552,485 | -1               | gtca <b>T</b> cttc |
| 175-12-1 | 3   | 21,676,609 | -1               | cgat <b>G</b> atgc |
| 175-12-1 | 4   | 4,159,520  | -1               | tgga <b>G</b> gggg |
| 175-1-4  | 1   | 8,176,912  | -1               | acat <b>G</b> tttt |
| 175-1-4  | 2   | 10,388,368 | -1               | gfat <b>A</b> aacg |
| 175-1-4  | 5   | 84,346     | -1               | aaag <b>A</b> aaaa |
| 175-1-4  | 5   | 7,195,682  | -1               | tatc <b>T</b> tttg |
| 175-2-4  | 1   | 12,931,508 | -1               | attat <b>T</b> aat |
| 175-2-4  | 2   | 10,972,839 | -1               | gata <b>T</b> tttt |
| 175-2-4  | 2   | 13,056,328 | -1               | ctcc <b>T</b> tttt |
| 175-2-4  | 3   | 19,760,337 | -1               | atga <b>T</b> gtgc |
| 175-2-4  | 3   | 22,154,527 | -1               | gaaa <b>T</b> caag |
| 175-2-4  | 5   | 2,906,800  | -1               | cacc <b>G</b> acgg |
| 175-4-1  | 1   | 7,190,092  | -1               | agtt <b>G</b> gtaa |
| 175-4-1  | 1   | 11,943,800 | -1               | atct <b>C</b> ccaa |
| 175-4-1  | 1   | 21,463,635 | -1               | ttaa <b>C</b> aaa  |
| 175-4-1  | 2   | 14,488,918 | -1               | tttt <b>C</b> ccca |
| 175-4-1  | 5   | 3,490,938  | -1               | caaa <b>T</b> tttt |

|         |   |            |    |                              |
|---------|---|------------|----|------------------------------|
| 175-5-1 | 1 | 1,483,693  | -1 | ccgc <b>T</b> agta           |
| 175-5-1 | 1 | 1,707,003  | -1 | atac <b>Tttt</b> c           |
| 175-5-1 | 1 | 22,959,254 | -1 | aact <b>G</b> actt           |
| 175-5-1 | 2 | 13,089,815 | -1 | cata <b>G</b> ttca           |
| 175-5-1 | 3 | 11,744,819 | -1 | gtgc <b>A</b> ataa           |
| 175-5-1 | 4 | 4,876,808  | -1 | agtc <b>A</b> tttg           |
| 175-5-1 | 4 | 15,554,563 | -1 | tgct <b>A</b> aagt           |
| 175-6-1 | 1 | 8,881,852  | -1 | aagt <b>G</b> al <b>g</b> aa |

Deleted bases are shown in bold. Homopolymeric sequences are underlined. Polynucleotide repeats are boxed. Two of -1 mutations that are expected to be induced by 2-bp deletion followed by 1-bp insertion are not included.

Single base deletion identified in seedling irradiation.

| Sample  | Chr | Position   | Type of mutation | Sequence                     |
|---------|-----|------------|------------------|------------------------------|
| 20-11-2 | 5   | 556,406    | -1               | agaa <b>G</b> acga           |
| 20-11-2 | 5   | 10,291,632 | -1               | aaat <b>Aaaaa</b>            |
| 20-2-3  | 4   | 2,339,717  | -1               | tcat <b>Aa</b> aca           |
| 20-2-3  | 4   | 12,199,215 | -1               | aaga <b>G</b> gctc           |
| 20-4-4  | 3   | 18,249,789 | -1               | cagt <b>Ca</b> l <b>ca</b> c |
| 20-5-3  | 2   | 8,178,652  | -1               | tgga <b>T</b> actt           |
| 20-5-3  | 4   | 16,096,073 | -1               | acta <b>G</b> ggct           |
| 20-5-3  | 4   | 17,044,669 | -1               | atga <b>Tttt</b> c           |
| 30-11-2 | 1   | 3,488,232  | -1               | tatc <b>Tttt</b>             |
| 30-11-2 | 4   | 4,974,796  | -1               | gatc <b>T</b> tatg           |
| 30-2-1  | 5   | 15,129,107 | -1               | cg <b>t</b> g <b>A</b> aatg  |
| 30-3-4  | 1   | 30,318,438 | -1               | agg <b>g</b> Ttaaa           |
| 30-4-1  | 1   | 11,709,531 | -1               | ctta <b>Tttt</b>             |
| 30-4-1  | 3   | 11,616,755 | -1               | ttt <b>C</b> cgac            |
| 30-7-1  | 1   | 2,312,788  | -1               | cttg <b>T</b> ttta           |
| 30-7-1  | 1   | 25,449,577 | -1               | cata <b>G</b> tatt           |

Deleted bases are shown in bold. Homopolymeric sequences are underlined. Polynucleotide repeats are boxed. -1 mutations expected to be induced by 2-bp deletion followed by 1-bp insertion are not included.

## Deletions of ≥2 bp identified in dry-seed irradiation.

| Sample   | Chr | Position   | Type of mutation | Sequence                       | Size (bp) |
|----------|-----|------------|------------------|--------------------------------|-----------|
| 125-10-5 | 1   | 25,115,764 | Del_≥2 bp        | ttca <b>CT</b> aact            | -2        |
| 125-10-5 | 3   | 16,755,265 | Del_≥2 bp        | gaaa <b>TC</b> tcaa            | -2        |
| 125-12-1 | 2   | 7,156,412  | Del_≥2 bp        | taat <b>AA</b> agtt            | -2        |
| 125-12-1 | 3   | 21,581,283 | Del_≥2 bp        | gtgg <b>AT</b> taat            | -2        |
| 125-2-2  | 2   | 14,419,918 | Del_≥2 bp        | tgag <b>TT</b> tttt            | -2        |
| 125-2-2  | 4   | 10,723,555 | Del_≥2 bp        | acca <b>GT</b> atgc            | -2        |
| 125-5-1  | 3   | 5,294,313  | Del_≥2 bp        | tcaa <b>AC</b> acat            | -2        |
| 125-6-1  | 3   | 17,786,949 | Del_≥2 bp        | agga <b>CC</b> aaag            | -2        |
| 175-1-4  | 5   | 16,344,361 | Del_≥2 bp        | acag <b>AA</b> caca            | -2        |
| 175-2-4  | 5   | 24,286,276 | Del_≥2 bp        | cagg <b>TA</b> tata            | -2        |
| 175-5-1  | 1   | 5,166,926  | Del_≥2 bp        | agtt <b>CC</b> ttcc            | -2        |
| 175-5-1  | 2   | 395,716    | Del_≥2 bp        | atct <b>AG</b> agat            | -2        |
| 175-5-1  | 3   | 7,522,459  | Del_≥2 bp        | ttca <b>AT</b> atct            | -2        |
| 175-5-1  | 5   | 13,307,876 | Del_≥2 bp        | ctgt <b>TC</b> acgc            | -2        |
| 175-6-1  | 1   | 4,530,659  | Del_≥2 bp        | ctca <b>GC</b> taac            | -2        |
| 175-6-1  | 1   | 10,940,869 | Del_≥2 bp        | gagc <b>GT</b> catt            | -2        |
| 175-6-1  | 4   | 5,470,763  | Del_≥2 bp        | tccg <b>AA</b> acaa            | -2        |
| 125-10-5 | 4   | 15,014,172 | Del_≥2 bp        | aatt <b>AAA</b> aaag           | -3        |
| 125-12-1 | 4   | 10,472,631 | Del_≥2 bp        | gatg <b>CTC</b> ctdc           | -3        |
| 125-2-2  | 4   | 17,312,251 | Del_≥2 bp        | atatt <b>TA</b> ataga          | -3        |
| 125-5-1  | 2   | 13,824,297 | Del_≥2 bp        | ggtt <b>ATG</b> tttt           | -3        |
| 125-5-1  | 3   | 4,153,732  | Del_≥2 bp        | cttg <b>CTA</b> ctca           | -3        |
| 125-5-1  | 5   | 1,091,474  | Del_≥2 bp        | actg <b>CTT</b> cttg           | -3        |
| 125-5-1  | 5   | 16,579,478 | Del_≥2 bp        | gacc <b>AAT</b> gtac           | -3        |
| 125-6-1  | 3   | 8,041,753  | Del_≥2 bp        | tatt <b>TTG</b> aaaa           | -3        |
| 125-6-1  | 4   | 6,696,328  | Del_≥2 bp        | aatg <b>TA</b> atagc           | -3        |
| 175-12-1 | 3   | 11,406,835 | Del_≥2 bp        | agaa <b>TTG</b> cctt           | -3        |
| 175-12-1 | 5   | 6,481,553  | Del_≥2 bp        | gcaa <b>ATT</b> aatg           | -3        |
| 175-1-4  | 2   | 2,788,013  | Del_≥2 bp        | acta <b>AAC</b> ctac           | -3        |
| 175-1-4  | 5   | 16,617,906 | Del_≥2 bp        | ctgg <b>TAA</b> gcat           | -3        |
| 175-2-4  | 4   | 4,274,350  | Del_≥2 bp        | tcta <b>CAT</b> catc           | -3        |
| 175-4-1  | 1   | 22,115,903 | Del_≥2 bp        | ccta <b>ACT</b> acat           | -3        |
| 175-4-1  | 4   | 616,130    | Del_≥2 bp        | atat <b>GAA</b> gaaa           | -3        |
| 175-5-1  | 4   | 4,180,450  | Del_≥2 bp        | atat <b>GCA</b> atga           | -3        |
| 175-6-1  | 1   | 5,341,405  | Del_≥2 bp        | tcaa <b>TGT</b> tggt           | -3        |
| 125-5-1  | 5   | 1,560,738  | Del_≥2 bp        | ttat <b>AAGA</b> aaaga         | -4        |
| 175-12-1 | 5   | 18,900,692 | Del_≥2 bp        | agac <b>CAAA</b> aaaa          | -4        |
| 175-1-4  | 1   | 20,186,405 | Del_≥2 bp        | a <b>cca</b> <b>AAAC</b> caact | -4        |
| 175-2-4  | 1   | 2,878,334  | Del_≥2 bp        | tata <b>GTTT</b> gatt          | -4        |
| 175-4-1  | 3   | 9,031,896  | Del_≥2 bp        | ttag <b>TTAT</b> ttat          | -4        |
| 175-4-1  | 4   | 15,364,201 | Del_≥2 bp        | gagg <b>TAAC</b> taica         | -4        |
| 175-5-1  | 1   | 17,303,879 | Del_≥2 bp        | agag <b>GTAC</b> gtaea         | -4        |
| 175-5-1  | 1   | 27,457,660 | Del_≥2 bp        | tgto <b>CTAA</b> ctaa          | -4        |

|          |   |            |           |                                               |     |
|----------|---|------------|-----------|-----------------------------------------------|-----|
| 175-6-1  | 4 | 18,553,820 | Del_≥2 bp | gagt <b>TTC</b> Cttca                         | -4  |
| 125-2-2  | 1 | 9,124,997  | Del_≥2 bp | cgat <b>AATCAG</b> aat                        | -5  |
| 125-2-2  | 4 | 14,147,272 | Del_≥2 bp | atct <b>TCA</b> Tc <b>ttca</b>                | -5  |
| 125-4-1  | 5 | 16,424,864 | Del_≥2 bp | tttc <b>CGGCT</b> aatt                        | -5  |
| 125-5-1  | 1 | 6,253,689  | Del_≥2 bp | atga <b>ATTAG</b> gtgc                        | -5  |
| 125-5-1  | 1 | 26,920,198 | Del_≥2 bp | ttaa <b>GAGAT</b> ggta                        | -5  |
| 125-5-1  | 5 | 25,068,035 | Del_≥2 bp | ttca <b>AATCG</b> actc                        | -5  |
| 175-12-1 | 5 | 11,147,410 | Del_≥2 bp | ttcc <b>TAACA</b> agca                        | -5  |
| 175-12-1 | 5 | 25,748,360 | Del_≥2 bp | tgac <b>TAATTTTT</b>                          | -5  |
| 175-2-4  | 3 | 12,794,444 | Del_≥2 bp | aatc <b>TTTTT</b> ttta                        | -5  |
| 175-4-1  | 4 | 13,728,384 | Del_≥2 bp | atcc <b>ACAAA</b> acaa                        | -5  |
| 125-12-1 | 2 | 7,709,941  | Del_≥2 bp | tact <b>ATGAAC</b> atta                       | -6  |
| 125-2-2  | 5 | 18,767,398 | Del_≥2 bp | gtga <b>TGGTTG</b> tgac                       | -6  |
| 125-4-1  | 5 | 15,405,223 | Del_≥2 bp | tttg <b>CTAAAC</b> cttg                       | -6  |
| 125-5-1  | 1 | 26,072,351 | Del_≥2 bp | taag <b>AGAGGA</b> caag                       | -6  |
| 125-5-1  | 2 | 6,937,742  | Del_≥2 bp | gtca <b>TGCTTC</b> tcta                       | -6  |
| 125-6-1  | 3 | 15,878,581 | Del_≥2 bp | gaaa <b>AGGGAG</b> agat                       | -6  |
| 175-5-1  | 2 | 16,163,504 | Del_≥2 bp | gaag <b>GCAAAC</b> tagg                       | -6  |
| 175-6-1  | 1 | 25,253,238 | Del_≥2 bp | cacc <b>ACCGTT</b> aaga                       | -6  |
| 175-6-1  | 5 | 9,293,322  | Del_≥2 bp | atgc <b>AGGCGA</b> ttta                       | -6  |
| 125-5-1  | 1 | 28,799,771 | Del_≥2 bp | gaaa <b>TGATACC</b> tgag                      | -7  |
| 125-6-1  | 5 | 25,905,384 | Del_≥2 bp | tgta <b>TTGAAT</b> caat                       | -7  |
| 175-12-1 | 3 | 15,239,723 | Del_≥2 bp | ccta <b>TAAATAC</b> tgaa                      | -7  |
| 175-1-4  | 4 | 4,704,733  | Del_≥2 bp | tccc <b>TAAGCGA</b> gttc                      | -7  |
| 125-2-2  | 1 | 24,726,936 | Del_≥2 bp | ttat <b>TACAGATC</b> taca                     | -8  |
| 125-4-1  | 3 | 11,165,929 | Del_≥2 bp | agct <b>ACAA</b> AATC <b>acaa</b>             | -8  |
| 125-5-1  | 3 | 9,239,983  | Del_≥2 bp | ttac <b>TCCAAGT</b> Gtaga                     | -8  |
| 125-5-1  | 4 | 18,242,556 | Del_≥2 bp | gcag <b>AATCAGGT</b> tctg                     | -8  |
| 125-6-1  | 5 | 13,796,775 | Del_≥2 bp | gcta <b>AACTAAA</b> Ac <b>cca</b>             | -8  |
| 175-2-4  | 2 | 12,367,411 | Del_≥2 bp | tgga <b>ACTTTTT</b> ttt                       | -8  |
| 175-2-4  | 5 | 18,926,429 | Del_≥2 bp | atta <b>GATAACAT</b> atag                     | -8  |
| 175-4-1  | 1 | 5,652,997  | Del_≥2 bp | tgct <b>TTGTTTG</b> acaa                      | -8  |
| 175-5-1  | 2 | 10,888,982 | Del_≥2 bp | atgt <b>ATTGTTAG</b> aaat                     | -8  |
| 175-5-1  | 5 | 26,591,541 | Del_≥2 bp | tttg <b>GCTCACGA</b> gatg                     | -8  |
| 125-12-1 | 1 | 824,389    | Del_≥2 bp | agac <b>GTCTAATTTTT</b>                       | -9  |
| 125-12-1 | 2 | 2,546,303  | Del_≥2 bp | aatg <b>ATGGCGACA</b> atgja                   | -9  |
| 125-6-1  | 2 | 13,026,798 | Del_≥2 bp | tagt <b>TTTGTTTGG</b> ttt                     | -9  |
| 125-10-5 | 5 | 15,422,503 | Del_≥2 bp | gaaa <b>AAAA...GAAT</b> cacg                  | -12 |
| 125-6-1  | 1 | 4,623,134  | Del_≥2 bp | tgtt <b>TC</b> TA... <b>AACA</b> tc <b>aa</b> | -12 |
| 175-2-4  | 3 | 18,497,940 | Del_≥2 bp | gatg <b>TGAA</b> ... <b>GTAAT</b> g <b>aa</b> | -12 |
| 175-6-1  | 1 | 18,637,436 | Del_≥2 bp | aatg <b>TTGT</b> ... <b>ACCC</b> ttg <b>t</b> | -12 |
| 175-6-1  | 1 | 24,901,914 | Del_≥2 bp | ttaa <b>ATGA</b> ... <b>GATG</b> at <b>aa</b> | -12 |
| 125-5-1  | 1 | 11,886,904 | Del_≥2 bp | ctag <b>AGAA</b> ... <b>TGCT</b> ag <b>aa</b> | -13 |
| 175-2-4  | 1 | 11,770,737 | Del_≥2 bp | actc <b>CAAC</b> ... <b>TTC</b> Ca <b>tac</b> | -13 |
| 175-5-1  | 1 | 5,668,629  | Del_≥2 bp | tctg <b>ATCG</b> ... <b>GGAA</b> at <b>ca</b> | -13 |

|          |   |            |           |                               |          |
|----------|---|------------|-----------|-------------------------------|----------|
| 175-5-1  | 1 | 12,144,842 | Del_≥2 bp | ttca <b>AGCT...GTT</b> Cgtt   | -13      |
| 175-6-1  | 4 | 12,953,725 | Del_≥2 bp | tggc <b>TCAA...ACG</b> Ttagc  | -13      |
| 125-12-1 | 5 | 3,487,785  | Del_≥2 bp | gaat <b>ATAA...CAG</b> Gaaga  | -14      |
| 175-5-1  | 2 | 16,319,558 | Del_≥2 bp | gggt <b>GTAA...ATAA</b> aata  | -14      |
| 175-2-4  | 4 | 12,174,699 | Del_≥2 bp | acag <b>AGAT...TAAA</b> actc  | -16      |
| 175-5-1  | 3 | 1,457,700  | Del_≥2 bp | cttg <b>TCAA...ATGA</b> tca   | -16      |
| 175-5-1  | 4 | 11,621,149 | Del_≥2 bp | aaat <b>TTAC...AAAA</b> ttac  | -16      |
| 125-12-1 | 5 | 17,528,084 | Del_≥2 bp | gccg <b>GAGG...GACC</b> tagt  | -17      |
| 125-2-2  | 5 | 20,891,510 | Del_≥2 bp | agtg <b>ATTT...GTAC</b> atct  | -17      |
| 125-5-1  | 2 | 12,559,488 | Del_≥2 bp | gagt <b>TCAT...CTAC</b> tcat  | -17      |
| 175-4-1  | 3 | 8,187,494  | Del_≥2 bp | atat <b>AGTT...AAAA</b> agctt | -18      |
| 175-6-1  | 1 | 6,417,811  | Del_≥2 bp | caac <b>ACTT...CAAG</b> aatt  | -18      |
| 125-10-5 | 2 | 6,248,477  | Del_≥2 bp | ggag <b>TTTT...CTCT</b> ttgt  | -22      |
| 125-4-1  | 1 | 10,335,193 | Del_≥2 bp | gcaa <b>AGAG...ACAG</b> aga   | -23      |
| 125-6-1  | 5 | 24,360,523 | Del_≥2 bp | tagt <b>AAAG...ACTA</b> accg  | -23      |
| 175-6-1  | 4 | 11,821,711 | Del_≥2 bp | tcga <b>ATGT...TCGC</b> atgc  | -24      |
| 175-4-1  | 3 | 18,753,702 | Del_≥2 bp | atcc <b>AGTT...CAAA</b> agtt  | -25      |
| 125-12-1 | 2 | 364,655    | Del_≥2 bp | tgaa <b>ACCA...AAAT</b> atca  | -26      |
| 125-2-2  | 2 | 14,816,650 | Del_≥2 bp | cagt <b>CAGC...TGAC</b> ttct  | -26      |
| 125-2-2  | 4 | 8,128,297  | Del_≥2 bp | ctca <b>GTTG...GAAG</b> gtaa  | -26      |
| 175-6-1  | 2 | 3,849,780  | Del_≥2 bp | cttg <b>TAA...CTAA</b> tgac   | -28      |
| 175-4-1  | 5 | 20,924,511 | Del_≥2 bp | attg <b>GTCC...TTAA</b> gttc  | -29      |
| 175-1-4  | 1 | 8,909,976  | Del_≥2 bp | actg <b>TCGG...AATT</b> tccg  | -30      |
| 125-4-1  | 5 | 24,449,837 | Del_≥2 bp | atgc <b>GAAT...AAGT</b> gaat  | -32      |
| 125-5-1  | 3 | 5,002,764  | Del_≥2 bp | tcct <b>TTGG...TGAT</b> tgat  | -32      |
| 175-2-4  | 3 | 13,531,918 | Del_≥2 bp | gaac <b>CGTA...CTGT</b> cgtt  | -32      |
| 125-2-2  | 4 | 9,618,651  | Del_≥2 bp | ataa <b>GAAG...GCTC</b> ttac  | -36      |
| 175-1-4  | 5 | 26,505,636 | Del_≥2 bp | cggt <b>AGAA...CGGC</b> agg   | -36      |
| 125-5-1  | 2 | 14,944,754 | Del_≥2 bp | tccc <b>TTTT...TAGC</b> aaac  | -37      |
| 175-12-1 | 3 | 4,087,237  | Del_≥2 bp | tgta <b>AGCT...TGTT</b> gaag  | -37      |
| 125-2-2  | 5 | 296,639    | Del_≥2 bp | actc <b>CGTT...CAGA</b> gtcg  | -44      |
| 175-2-4  | 5 | 2,024,079  | Del_≥2 bp | gcat <b>TCGA...CCAG</b> gatt  | -45      |
| 125-4-1  | 5 | 4,935,416  | Del_≥2 bp | aact <b>TAAG...TACA</b> aact  | -52      |
| 175-2-4  | 1 | 17,258,954 | Del_≥2 bp | ggca <b>GCGT...AGCA</b> ttac  | -67      |
| 125-10-5 | 4 | 11,649,411 | Del_≥2 bp | cttt <b>CTTT...GTAA</b> ttgt  | -144     |
| 175-5-1  | 3 | 17,667,864 | Del_≥2 bp | ttca <b>TCTC...TGAT</b> ctta  | -166     |
| 125-10-5 | 1 | 29,787,264 | Del_≥2 bp | atat <b>AGAA...CTAC</b> gagc  | -308     |
| 125-5-1  | 4 | 4,902,653  | Del_≥2 bp | atcc <b>ACTA...TAGA</b> acgg  | -1,264   |
| 125-12-1 | 2 | 19,344,169 | Del_≥2 bp | agat <b>ACAG...ACAT</b> tttt  | -6,313   |
| 125-6-1  | 2 | 6,349,896  | Del_≥2 bp | tata <b>TTGG...TCCG</b> agag  | -245,416 |
| 175-4-1  | 5 | 15,108,168 | Del_≥2 bp | atct <b>TCTC...AAAA</b> acta  | -281,933 |

Deleted sequences are shown in bold. Homopolymeric sequences are underlined. Polynucleotide repeats or microhomologous sequences found in rejoined ends are boxed. Nine mutations accompanied by an insertion of unknown sequence are not included.



Deletions of ≥2 bp identified in seedling irradiation.

| Sample  | Chr | Position   | Type of mutation | Sequence                      | Size (bp) |
|---------|-----|------------|------------------|-------------------------------|-----------|
| 20-11-2 | 4   | 17,731,957 | Del_≥2 bp        | tatt <b>AA</b> aaaa           | -2        |
| 30-3-4  | 5   | 578,928    | Del_≥2 bp        | tcac <b>AA</b> aatt           | -2        |
| 20-2-3  | 1   | 28,183,231 | Del_≥2 bp        | agaa <b>TCC</b> tcct          | -3        |
| 20-5-3  | 1   | 21,625,965 | Del_≥2 bp        | ggac <b>GAA</b> gaag          | -3        |
| 30-4-1  | 3   | 23,420,715 | Del_≥2 bp        | aaga <b>TCT</b> tctt          | -3        |
| 30-7-1  | 5   | 16,571,621 | Del_≥2 bp        | tact <b>CA</b> aggtg          | -3        |
| 30-7-1  | 3   | 6,329,883  | Del_≥2 bp        | gatg <b>TTT</b> Ctgg          | -4        |
| 20-2-3  | 5   | 6,014,221  | Del_≥2 bp        | caca <b>GAAAC</b> atat        | -5        |
| 30-4-1  | 1   | 10,341,117 | Del_≥2 bp        | ggtt <b>TATAG</b> tata        | -5        |
| 20-3-1  | 4   | 3,447,499  | Del_≥2 bp        | ctca <b>TCACTC</b> taaa       | -6        |
| 30-3-4  | 3   | 84,833     | Del_≥2 bp        | aaca <b>TAGCTT</b> tagg       | -6        |
| 30-4-1  | 1   | 20,382,260 | Del_≥2 bp        | tcca <b>GGACCG</b> ccgg       | -6        |
| 30-7-1  | 5   | 8,938,331  | Del_≥2 bp        | acga <b>GAAGGG</b> tttg       | -6        |
| 20-1-2  | 2   | 198,917    | Del_≥2 bp        | tact <b>ACCACAAC</b> acta     | -8        |
| 30-11-2 | 1   | 6,542,443  | Del_≥2 bp        | tatt <b>TATAAGTC</b> tata     | -8        |
| 30-6-2  | 1   | 7,378,262  | Del_≥2 bp        | caca <b>TGACTGAT</b> tacc     | -8        |
| 30-7-1  | 3   | 1,752,879  | Del_≥2 bp        | gcat <b>CTTCTCTA</b> atga     | -8        |
| 20-11-2 | 2   | 4,042,421  | Del_≥2 bp        | ctat <b>AATTGGTCC</b> tgtg    | -9        |
| 20-11-2 | 3   | 20,481,257 | Del_≥2 bp        | agat <b>CATACACAA</b> catt    | -9        |
| 30-4-1  | 3   | 19,437,059 | Del_≥2 bp        | aaat <b>AAA</b> ACTTTCAaaat   | -10       |
| 20-5-3  | 4   | 17,382,806 | Del_≥2 bp        | aaat <b>ATAA...TTGG</b> aaaag | -12       |
| 20-1-2  | 3   | 18,528,885 | Del_≥2 bp        | aatg <b>TTG</b> G...TTGCttga  | -13       |
| 30-7-1  | 4   | 7,410,976  | Del_≥2 bp        | tact <b>CCAT...TTCA</b> ccac  | -13       |
| 30-7-1  | 3   | 22,551,700 | Del_≥2 bp        | gaaa <b>ATGT...GGTC</b> atgt  | -14       |
| 30-7-1  | 2   | 14,524,698 | Del_≥2 bp        | ttca <b>AGTT...TCAT</b> atgt  | -15       |
| 20-1-2  | 1   | 12,363,887 | Del_≥2 bp        | ctct <b>CATT...TAGG</b> acaa  | -19       |
| 20-11-2 | 3   | 18,920,796 | Del_≥2 bp        | cagt <b>CCCT...AGGA</b> gagt  | -21       |
| 20-11-2 | 5   | 1,079,961  | Del_≥2 bp        | aatc <b>TTAT...CTAA</b> ttat  | -24       |
| 20-2-3  | 2   | 806,206    | Del_≥2 bp        | tggg <b>GAAC...CTGA</b> gtta  | -24       |
| 20-3-1  | 5   | 18,522,272 | Del_≥2 bp        | aatt <b>ATCT...AAGA</b> tttt  | -24       |
| 30-7-1  | 3   | 15,523,392 | Del_≥2 bp        | tggc <b>TCAG...GAGC</b> tgtt  | -24       |
| 20-1-2  | 4   | 18,210,058 | Del_≥2 bp        | caca <b>GGTA...CTGTT</b> ggaa | -26       |
| 20-11-2 | 4   | 11,260,291 | Del_≥2 bp        | gtca <b>TCGA...GCCC</b> tccc  | -27       |
| 20-1-2  | 5   | 8,612,292  | Del_≥2 bp        | aacc <b>AAAC...TATA</b> aaat  | -33       |
| 30-2-1  | 2   | 1,093,918  | Del_≥2 bp        | actc <b>TGTT...ATGT</b> tgtg  | -33       |
| 30-11-2 | 4   | 6,596,785  | Del_≥2 bp        | cggt <b>AGAA...CACT</b> gtcc  | -36       |
| 20-4-4  | 5   | 8,315,271  | Del_≥2 bp        | aggg <b>AATG...TGAG</b> aggg  | -41       |
| 20-1-2  | 3   | 5,738,697  | Del_≥2 bp        | gaga <b>GCTA...GGAG</b> gctg  | -45       |
| 20-5-3  | 4   | 14,028,056 | Del_≥2 bp        | ttgg <b>GTTG...TTGA</b> aaca  | -57       |
| 20-5-3  | 5   | 17,811,077 | Del_≥2 bp        | tgat <b>GGGG...CTAT</b> atg   | -141      |

|        |   |            |           |                                       |        |
|--------|---|------------|-----------|---------------------------------------|--------|
| 20-5-3 | 3 | 1,671,663  | Del_≥2 bp | actg <b>GCTC</b> ... <b>CCAA</b> gcat | -153   |
| 20-3-1 | 2 | 7,140,512  | Del_≥2 bp | cttg <b>AACC</b> ... <b>GTAG</b> gaga | -480   |
| 30-2-1 | 5 | 4,243,291  | Del_≥2 bp | tccg <b>TCAC</b> ... <b>ATAG</b> agag | -1,441 |
| 20-2-3 | 1 | 17,130,087 | Del_≥2 bp | ttga <b>GTAC</b> ... <b>TAGA</b> agaa | -1,901 |

Deleted sequences are shown in bold. Homopolymeric sequences are underlined. Polynucleotide repeats or microhomologous sequences found in rejoined ends are boxed. Four mutations accompanied by an insertion of unknown sequence are not included.

Single base insertions identified in dry-seed irradiation.

| Sample   | Chr | Position   | Type of mutation | Sequence                  | Inserted nucleotide |
|----------|-----|------------|------------------|---------------------------|---------------------|
| 125-12-1 | 4   | 15,342,414 | +1               | <u>ttt</u> * <u>aaaa</u>  | A                   |
| 125-2-2  | 1   | 9,148,100  | +1               | <u>aata</u> * <u>aata</u> | T                   |
| 125-2-2  | 1   | 11,733,176 | +1               | acct*ggag                 | G                   |
| 125-2-2  | 1   | 23,705,214 | +1               | gtag*catt                 | T                   |
| 125-2-2  | 3   | 15,023,913 | +1               | tgga* <u>ttt</u>          | T                   |
| 125-2-2  | 5   | 23,626,714 | +1               | attg* <u>aat</u>          | A                   |
| 125-6-1  | 2   | 18,374,032 | +1               | ttca*taac                 | T                   |
| 125-6-1  | 5   | 21,016,447 | +1               | <u>ttt</u> * <u>aaaa</u>  | A                   |
| 175-12-1 | 4   | 3,860,342  | +1               | atta* <u>ttt</u>          | T                   |
| 175-12-1 | 4   | 13,973,558 | +1               | aagc*ttgc                 | T                   |
| 175-2-4  | 3   | 9,305,559  | +1               | ttta* <u>taaa</u>         | A                   |
| 175-2-4  | 3   | 21,633,156 | +1               | <u>cttc</u> * <u>ttat</u> | T                   |
| 175-2-4  | 4   | 16,779,820 | +1               | ctac* <u>aaaa</u>         | A                   |
| 175-4-1  | 1   | 16,252,297 | +1               | ttgc*aatt                 | A                   |

Asterisks indicate insertion position. Homopolymeric sequences are underlined. Polynucleotide repeats are boxed. Two mutations expected to be induced by “3-bp deletion followed by 4-bp insertion” and “2-bp deletion followed by 3-bp insertion” are not included.

Single base insertions identified in seedling irradiation.

| Sample  | Chr | Position   | Type of mutation | Sequence                   | Inserted nucleotide |
|---------|-----|------------|------------------|----------------------------|---------------------|
| 20-11-2 | 1   | 26,986,773 | +1               | ggga*ttcg                  | T                   |
| 20-4-4  | 2   | 7,204,908  | +1               | <u>taatt</u> * <u>aaaa</u> | A                   |
| 30-11-2 | 1   | 18,032,053 | +1               | acag* <u>aaaa</u>          | A                   |
| 30-7-1  | 1   | 4,861,400  | +1               | <u>caalc</u> * <u>aaaa</u> | A                   |

Asterisk indicates insertion position. Homopolymeric sequences are underlined. Polynucleotide repeats are boxed.

Insertions of  $\geq 2$ bp identified in dry-seed irradiation.

| Sample   | Chr | Position   | Type of mutation | Sequence                   | Inserted nucleotide | Size (bp) |
|----------|-----|------------|------------------|----------------------------|---------------------|-----------|
| 125-4-1  | 1   | 26,453,736 | Ins_ $\geq 2$ bp | tctg* <u>atat</u>          | <u>AT</u>           | +2        |
| 125-4-1  | 4   | 15,565,948 | Ins_ $\geq 2$ bp | aaag* <u>atat</u>          | <u>AT</u>           | +2        |
| 125-6-1  | 5   | 23,475,568 | Ins_ $\geq 2$ bp | ataa* <u>agag</u>          | <u>AG</u>           | +2        |
| 175-1-4  | 3   | 1,064,359  | Ins_ $\geq 2$ bp | tagc* <u>atat</u>          | <u>AT</u>           | +2        |
| 175-2-4  | 4   | 1,640,569  | Ins_ $\geq 2$ bp | gaac* <u>tttt</u>          | TT                  | +2        |
| 175-2-4  | 4   | 14,290,505 | Ins_ $\geq 2$ bp | <u>gtgt</u> * <u>tggtg</u> | <u>TG</u>           | +2        |
| 175-4-1  | 1   | 14,482,543 | Ins_ $\geq 2$ bp | agtc* <u>tgaa</u>          | TT                  | +2        |
| 175-6-1  | 4   | 12,433,190 | Ins_ $\geq 2$ bp | ggtc* <u>gctg</u>          | <u>GCT</u>          | +3        |
| 125-4-1  | 1   | 18,999,155 | Ins_ $\geq 2$ bp | cctt* <u>tttc</u>          | <u>TTTC</u>         | +4        |
| 175-1-4  | 2   | 17,134,939 | Ins_ $\geq 2$ bp | cttg* <u>cgaa</u>          | <u>CGAAT</u>        | +5        |
| 175-12-1 | 2   | 9,454,654  | Ins_ $\geq 2$ bp | ttca* <u>aatt</u>          | <u>AATT</u> TTCACT  | +10       |
| 175-5-1  | 2   | 19,208,090 | Ins_ $\geq 2$ bp | <u>taaa</u> * <u>aatt</u>  | ATAA...ATGT         | +17       |
| 125-12-1 | 1   | 20,607,208 | Ins_ $\geq 2$ bp | cgag* <u>tatt</u>          | TTTT...CAAA         | +27       |

Asterisk indicates insertion position. Homopolymeric sequences are underlined. Polynucleotide repeats or microhomologous sequences found in rejoined ends are boxed.

Insertions of  $\geq 2$ bp identified in seedling irradiation.

| Sample  | Chr | Position   | Type of mutation | Sequence                  | Inserted nucleotide | Size (bp) |
|---------|-----|------------|------------------|---------------------------|---------------------|-----------|
| 20-1-2  | 3   | 23,378,897 | Ins_ $\geq 2$ bp | ggat* <u>taag</u>         | <u>TAGCC</u>        | +5        |
| 30-7-1  | 3   | 1,954,024  | Ins_ $\geq 2$ bp | ctct* <u>tttt</u>         | <u>TTTT</u> TG      | +5        |
| 30-3-4  | 5   | 9,561,866  | Ins_ $\geq 2$ bp | tctg* <u>tggtt</u>        | <u>TGTT</u> ...TTCA | +12       |
| 30-11-2 | 1   | 8,024,381  | Ins_ $\geq 2$ bp | <u>aaaa</u> * <u>cgaa</u> | <u>CG</u> TA...AATT | +47       |

Asterisk indicates insertion position. Homopolymeric sequences are underlined. Polynucleotide repeats or microhomologous sequences found in rejoined ends are boxed.

**Table S6.** Details of complex-type mutations.

Complex-type mutations identified in dry-seed irradiation.

| Sample   | Chr | Position   | Type of mutation | Original sequence                      | Altered sequence                | Summary                   |
|----------|-----|------------|------------------|----------------------------------------|---------------------------------|---------------------------|
| 125-10-5 | 2   | 5,641,286  | Complex          | tatt <b>CC</b> attt                    | tatt <b>AT</b> attt             | SBS×2                     |
| 125-12-1 | 5   | 1,553,890  | Complex          | gaaa <b>AG</b> taaa                    | gaaa <b>TT</b> taaa             | SBS×2                     |
| 125-2-2  | 4   | 6,671,908  | Complex          | tggg <b>GT</b> cggtg                   | tggg <b>AA</b> cggtg            | SBS×2                     |
| 125-2-2  | 4   | 11,005,321 | Complex          | tgct <b>GT</b> caaa                    | tgct <b>AA</b> caaa             | SBS×2                     |
| 125-2-2  | 5   | 21,587,693 | Complex          | ttat <b>CT</b> tcat                    | ttat <b>TC</b> tcat             | SBS×2                     |
| 125-4-1  | 2   | 2,827,384  | Complex          | ttgg <b>AG</b> agac                    | ttgg <b>GA</b> agac             | SBS×2                     |
| 125-5-1  | 5   | 20,905,119 | Complex          | ataa <b>GG</b> attt                    | ataa <b>AA</b> attt             | SBS×2                     |
| 125-5-1  | 5   | 22,060,358 | Complex          | ctaa <b>CC</b> aaaa                    | ctaa <b>AA</b> aaaa             | SBS×2                     |
| 175-2-4  | 3   | 21,185,003 | Complex          | gaag <b>CC</b> taga                    | gaag <b>AA</b> taga             | SBS×2                     |
| 175-4-1  | 4   | 5,247,540  | Complex          | gcg <b>CA</b> cgta                     | gcg <b>AT</b> cgta              | SBS×2                     |
| 175-5-1  | 5   | 4,537,230  | Complex          | atgt <b>AC</b> tcta                    | atgt <b>TT</b> tcta             | SBS×2                     |
| 175-6-1  | 1   | 10,292,187 | Complex          | gagt <b>TT</b> gcca                    | gagt <b>AA</b> gcca             | SBS×2                     |
| 175-6-1  | 4   | 2,659,973  | Complex          | tttc <b>AT</b> ataa                    | tttc <b>GA</b> ataa             | SBS×2                     |
| 175-6-1  | 5   | 5,995,045  | Complex          | cgaa <b>AG</b> attc                    | cgaa <b>TT</b> attc             | SBS×2                     |
| 125-4-1  | 5   | 16,591,716 | Complex          | gcta <b>AT</b> tctgt                   | gcta <b>Tt</b> Ctctgt           | SBS×2 (1 bp gap)          |
| 125-6-1  | 3   | 15,886,369 | Complex          | attg <b>Ca</b> Catat                   | attg <b>Aa</b> Tatat            | SBS×2 (1 bp gap)          |
| 175-1-4  | 5   | 8,145,982  | Complex          | attt <b>Ta</b> Ttagg                   | attt <b>Aa</b> Ctagg            | SBS×2 (1 bp gap)          |
| 175-5-1  | 4   | 3,276,508  | Complex          | caat <b>Gg</b> Ctgca                   | caat <b>Tg</b> Gtgca            | SBS×2 (1 bp gap)          |
| 125-12-1 | 2   | 13,864,099 | Complex          | cacc <b>Acc</b> Accgt                  | cacc <b>Ccc</b> Cccgt           | SBS×2 (2 bp gap)          |
| 125-5-1  | 5   | 14,691,336 | Complex          | gcaa <b>Taaa</b> Gattc                 | gcaa <b>Aaaa</b> Cattc          | SBS×2 (3 bp gap)          |
| 125-2-2  | 1   | 24,907,911 | Complex          | aaat <b>Tac</b> ggAttta                | aaat <b>Cac</b> ggGttta         | SBS×2 (4 bp gap)          |
| 175-4-1  | 1   | 5,773,394  | Complex          | ccta <b>Gt</b> atttGttt                | ccta <b>Att</b> atttAttt        | SBS×2 (6 bp gap)          |
| 175-1-4  | 5   | 16,351,557 | Complex          | caatcg <b>At</b> gag                   | caat <b>CCA</b> cgTtgag         | +3 bp, SBS (2 bp gap)     |
| 175-6-1  | 1   | 24,542,359 | Complex          | ccat <b>Gggg</b> ccgTttca              | ccatggg <b>ccg</b> Cttca        | -1 bp, SBS (6 bp gap)     |
| 125-5-1  | 4   | 10,605,193 | Complex          | taaa <b>AAGGTGAA</b> acTaaaa           | taaa <b>TTC</b> acCaaaa         | -8+3 bp, SBS (2 bp gap)   |
| 175-6-1  | 2   | 12,287,890 | Complex          | catc <b>CA</b> ctga <b>TCCTAC</b> tttc | catc <b>ctga</b> <b>AA</b> tttc | -2 bp, -6+2 bp (4 bp gap) |

|          |   |            |         |                                                      |                                                                  |                           |
|----------|---|------------|---------|------------------------------------------------------|------------------------------------------------------------------|---------------------------|
| 175-12-1 | 1 | 19,191,737 | Complex | catg <b>AATTT</b> ctg <b>CTT</b> Cttct               | catg <b>GAA</b> ctgttct                                          | -5+3 bp, -4 bp (3 bp gap) |
| 175-6-1  | 1 | 27,974,164 | Complex | cctt <b>CTTTTTTTTTAA</b> Aaaa <b>A</b> at            | cctt <b>AT</b> aaa <b>C</b> atat                                 | -12+2 bp, SBS (3 bp gap)  |
| 175-6-1  | 3 | 20,597,318 | Complex | gata <b>GGCA...ATCCAA</b> acaaaa <b>A</b><br>caat    | gata <b>AC</b> acaaa <b>T</b> caat                               | -26+2 bp, SBS (5 bp gap)  |
| 175-6-1  | 1 | 24,542,344 | Complex | cttt <b>T</b> gatacc <b>T</b> tgaagtga <b>A</b> gggt | cttt <b>C</b> tgat <b>GA</b> acc <b>C</b> tgaagtga <b>C</b> gggt | More than 3 changes       |

Altered sequences are shown in bold.

Complex-type mutations identified in seedling irradiation.

| Sample  | Chr | Position   | Type of mutation | Original sequence                         | Altered sequence                            | Summary                     |
|---------|-----|------------|------------------|-------------------------------------------|---------------------------------------------|-----------------------------|
| 20-2-3  | 2   | 10,262,502 | Complex          | gata <b>AA</b> gat                        | gata <b>GC</b> gat                          | SBS×2                       |
| 20-2-3  | 5   | 1,099,628  | Complex          | tgac <b>CA</b> ctta                       | tgac <b>TT</b> ctta                         | SBS×2                       |
| 20-3-1  | 3   | 7,693,524  | Complex          | ttct <b>TC</b> ctca                       | ttct <b>CT</b> ctca                         | SBS×2                       |
| 20-4-4  | 5   | 6,317,860  | Complex          | gtat <b>TT</b> tac                        | gtat <b>AA</b> tac                          | SBS×2                       |
| 20-5-3  | 3   | 8,579,840  | Complex          | aatc <b>TA</b> tttc                       | aatc <b>AT</b> tttc                         | SBS×2                       |
| 30-11-2 | 4   | 6,986,614  | Complex          | agtt <b>TG</b> aaaa                       | agtt <b>AA</b> aaaa                         | SBS×2                       |
| 30-4-1  | 2   | 6,908,771  | Complex          | aaga <b>GC</b> tgac                       | aaga <b>AA</b> tgac                         | SBS×2                       |
| 30-7-1  | 3   | 16,961,207 | Complex          | cagt <b>GG</b> agcc                       | cagt <b>CA</b> agcc                         | SBS×2                       |
| 20-11-2 | 1   | 20,029,121 | Complex          | agaa <b>GCA</b> tggt                      | agaa <b>AGT</b> tggt                        | SBS×3                       |
| 20-5-3  | 3   | 2,162,882  | Complex          | atgc <b>TaG</b> gata                      | atgc <b>CaT</b> gata                        | SBS×2 (1 bp gap)            |
| 20-1-2  | 3   | 14,493,990 | Complex          | aaaa <b>GatC</b> tctt                     | aaaa <b>TatT</b> ctt                        | SBS×2 (2 bp gap)            |
| 30-3-4  | 3   | 3,237,415  | Complex          | ttga <b>AagG</b> acca                     | ttga <b>TagT</b> acca                       | SBS×2 (2 bp gap)            |
| 20-1-2  | 3   | 19,169,271 | Complex          | caga <b>AgaaG</b> atct                    | caga <b>TgaaC</b> atct                      | SBS×2 (3 bp gap)            |
| 30-4-1  | 2   | 5,670,355  | Complex          | acct <b>CcatA</b> tcaa                    | acct <b>TcatG</b> tcaa                      | SBS×2 (3 bp gap)            |
| 20-2-3  | 3   | 183,269    | Complex          | cttg <b>T</b> tgaga <b>T</b> aaat         | cttg <b>G</b> tgaga <b>G</b> aaat           | SBS×2 (5 bp gap)            |
| 20-1-2  | 2   | 17,239,430 | Complex          | ataa <b>AATTG</b> ita <b>T</b> aaa        | ataa <b>TttaACAAA</b> taaa                  | -5+1 bp, -1+5 bp (3 bp gap) |
| 30-6-2  | 1   | 3,859,020  | Complex          | ggctag <b>T</b> ctat                      | ggct <b>TTATCCGAAATG</b> ag <b>AG</b> ctat  | +12 bp, -1+2 bp (2 bp gap)  |
| 30-6-2  | 1   | 12,448,959 | Complex          | tcta <b>C</b> gtagctg                     | tcta <b>T</b> gtag <b>ATGA...CATG</b> cgtag | SBS, +97 bp (4 bp gap)      |
| 30-6-2  | 2   | 17,255,001 | Complex          | aatt <b>TAG</b> atata <b>A</b> atc        | aatt <b>t</b> atata <b>G</b> aatc           | -4 bp, SBS (4 bp gap)       |
| 30-11-2 | 5   | 11,984,996 | Complex          | gata <b>TTCTCGGATTTT</b> at <b>T</b> gagg | gata <b>atG</b> gagg                        | -12 bp, SBS (2 bp gap)      |

|         |   |            |         |                                                                             |                                                                                    |                            |
|---------|---|------------|---------|-----------------------------------------------------------------------------|------------------------------------------------------------------------------------|----------------------------|
| 30-2-1  | 1 | 3,997,615  | Complex | agaa <b>GATG...TGTG</b> ctcggt                                              | agaact <b>GGAAAA</b> cgtt                                                          | -36 bp, +6 bp (2 bp gap)   |
| 20-5-3  | 5 | 5,369,001  | Complex | atgc <b>TTG</b> agagaa <b>GTTT...TTT</b> gtt<br>g                           | atgc <b>ATAA</b> agagaagttg                                                        | -3+4 bp, -24 bp (6 bp gap) |
| 20-11-2 | 1 | 24,023,841 | Complex | ctcc <b>TTTTCTG</b> ct <b>GaC</b> cactcttgt                                 | ctcc <b>AGT</b> ct <b>AaG</b> ca <b>TTACT</b> ctc <b>CGAAATCTG</b><br><b>Gttgt</b> | More than 3 changes        |
| 20-11-2 | 3 | 2,999,203  | Complex | attt <b>TCAAAACCCTAAGC</b> tAatT<br>tttt <b>AaaAAATTTGTATG</b> aaTTta<br>ga | atTTtTatAtTTtCaaaa <b>CG</b> taga                                                  | More than 3 changes        |
| 20-1-2  | 2 | 16,832,880 | Complex | gggt <b>G</b> agaa <b>AG</b> aa <b>TaaCCT</b> actt                          | gggtagaa <b>GC</b> aa <b>G</b> aaactt                                              | More than 3 changes        |
| 30-7-1  | 5 | 26,821,710 | Complex | actcTagt <b>A</b> tca <b>A</b> tgc <b>TT</b> aaga                           | actc <b>C</b> agtTt <b>TTT</b> Cca <b>GtG</b> gcaaga                               | More than 3 changes        |

Altered sequences are shown in bold.

**Table S7.** Number of mutation events that resulted in non-synonymous amino acid changes in protein coding genes.

| Dry-seed 125 Gy |          |          |         |         |         |         |                |
|-----------------|----------|----------|---------|---------|---------|---------|----------------|
| Sample          | 125-10-5 | 125-12-1 | 125-2-2 | 125-4-1 | 125-5-1 | 125-6-1 | Total          |
| Homo            | 0        | 1        | 4       | 0       | 4       | 2       | 11 (1.8 ± 0.7) |
| Hetero          | 7        | 6        | 10      | 5       | 8       | 2       | 38             |
| Total           | 7        | 7        | 14      | 5       | 12      | 4       | 49 (6.3 ± 1.1) |
| Dry-seed 175 Gy |          |          |         |         |         |         |                |
| Sample          | 175-1-4  | 175-12-1 | 175-2-4 | 175-4-1 | 175-5-1 | 175-6-1 | Total          |
| Homo            | 4        | 1        | 1       | 5       | 7       | 2       | 20 (3.3 ± 1.0) |
| Hetero          | 2        | 2        | 10      | 6       | 6       | 13      | 39             |
| Total           | 6        | 3        | 11      | 11      | 13      | 15      | 59 (6.5 ± 1.8) |
| Seedling 20 Gy  |          |          |         |         |         |         |                |
| Sample          | 20-11-2  | 20-1-2   | 20-2-3  | 20-3-1  | 20-4-4  | 20-5-3  | Total          |
| Homo            | 2        | 1        | 0       | 3       | 1       | 0       | 7 (1.2 ± 0.5)  |
| Hetero          | 3        | 6        | 4       | 0       | 0       | 14      | 27             |
| Total           | 5        | 7        | 4       | 3       | 1       | 14      | 34 (4.5 ± 2.1) |
| Seedling 30 Gy  |          |          |         |         |         |         |                |
| Sample          | 30-11-2  | 30-2-1   | 30-3-4  | 30-4-1  | 30-6-2  | 30-7-1  | Total          |
| Homo            | 0        | 1        | 1       | 1       | 0       | 0       | 3 (0.5 ± 0.2)  |
| Hetero          | 0        | 4        | 2       | 3       | 1       | 7       | 17             |
| Total           | 0        | 5        | 3       | 4       | 1       | 7       | 20 (2.8 ± 1.0) |

Transposable elements, pseudogenes, and structural variations are not included.

Numbers in parentheses represent mean ± standard error of 6 samples in each group.

\* Ratio could not be calculated, because all identified mutations were heterozygous.

\*\* Data from sample 30-7-1 were not included in calculation.
